# Supplementary material
Source: PubMed Central journal article supplement (PMC3338323)
Supplement: NIHMS367977-supplement-1.pdf [file NIHMS367977-supplement-1.pdf]

## Supplementary Information

**Supplementary Figure1: Gal-1 promotes apoptosis of CD4 T cells.** Cells isolated from draining lymph nodes of HSV-1 infected mice (day 15 post infection) were incubated without gal-1 (control) and with gal-1 (20 $\mu$ g), with or without 50mM lactose for a period of 5 hours. After gal-1 exposure, cells were stained with PI, FITC-annexin V and APC-CD4. A-C, Representative histograms show (A) Annexin V<sup>+</sup> PI<sup>+</sup> without galectin- 1, (B) Annexin V<sup>+</sup> CD4<sup>+</sup> T cells without galectin- 1, (C) PI<sup>+</sup> CD4<sup>+</sup> T cells without galectin- 1. D-E, Representative histograms show (B) Annexin V<sup>+</sup> PI<sup>+</sup> cells with galectin- 1 (20 $\mu$ g ) (B) Annexin V<sup>+</sup> CD4<sup>+</sup> T cells with galectin- 1 (20 $\mu$ g ) (C) PI<sup>+</sup> CD4<sup>+</sup> T cells with galectin- 1 (20 $\mu$ g ).
